# Supplementary material
Source: ML conference proceedings conference paper supplement (https://openreview.net/forum?id=c7qZNpguY0)

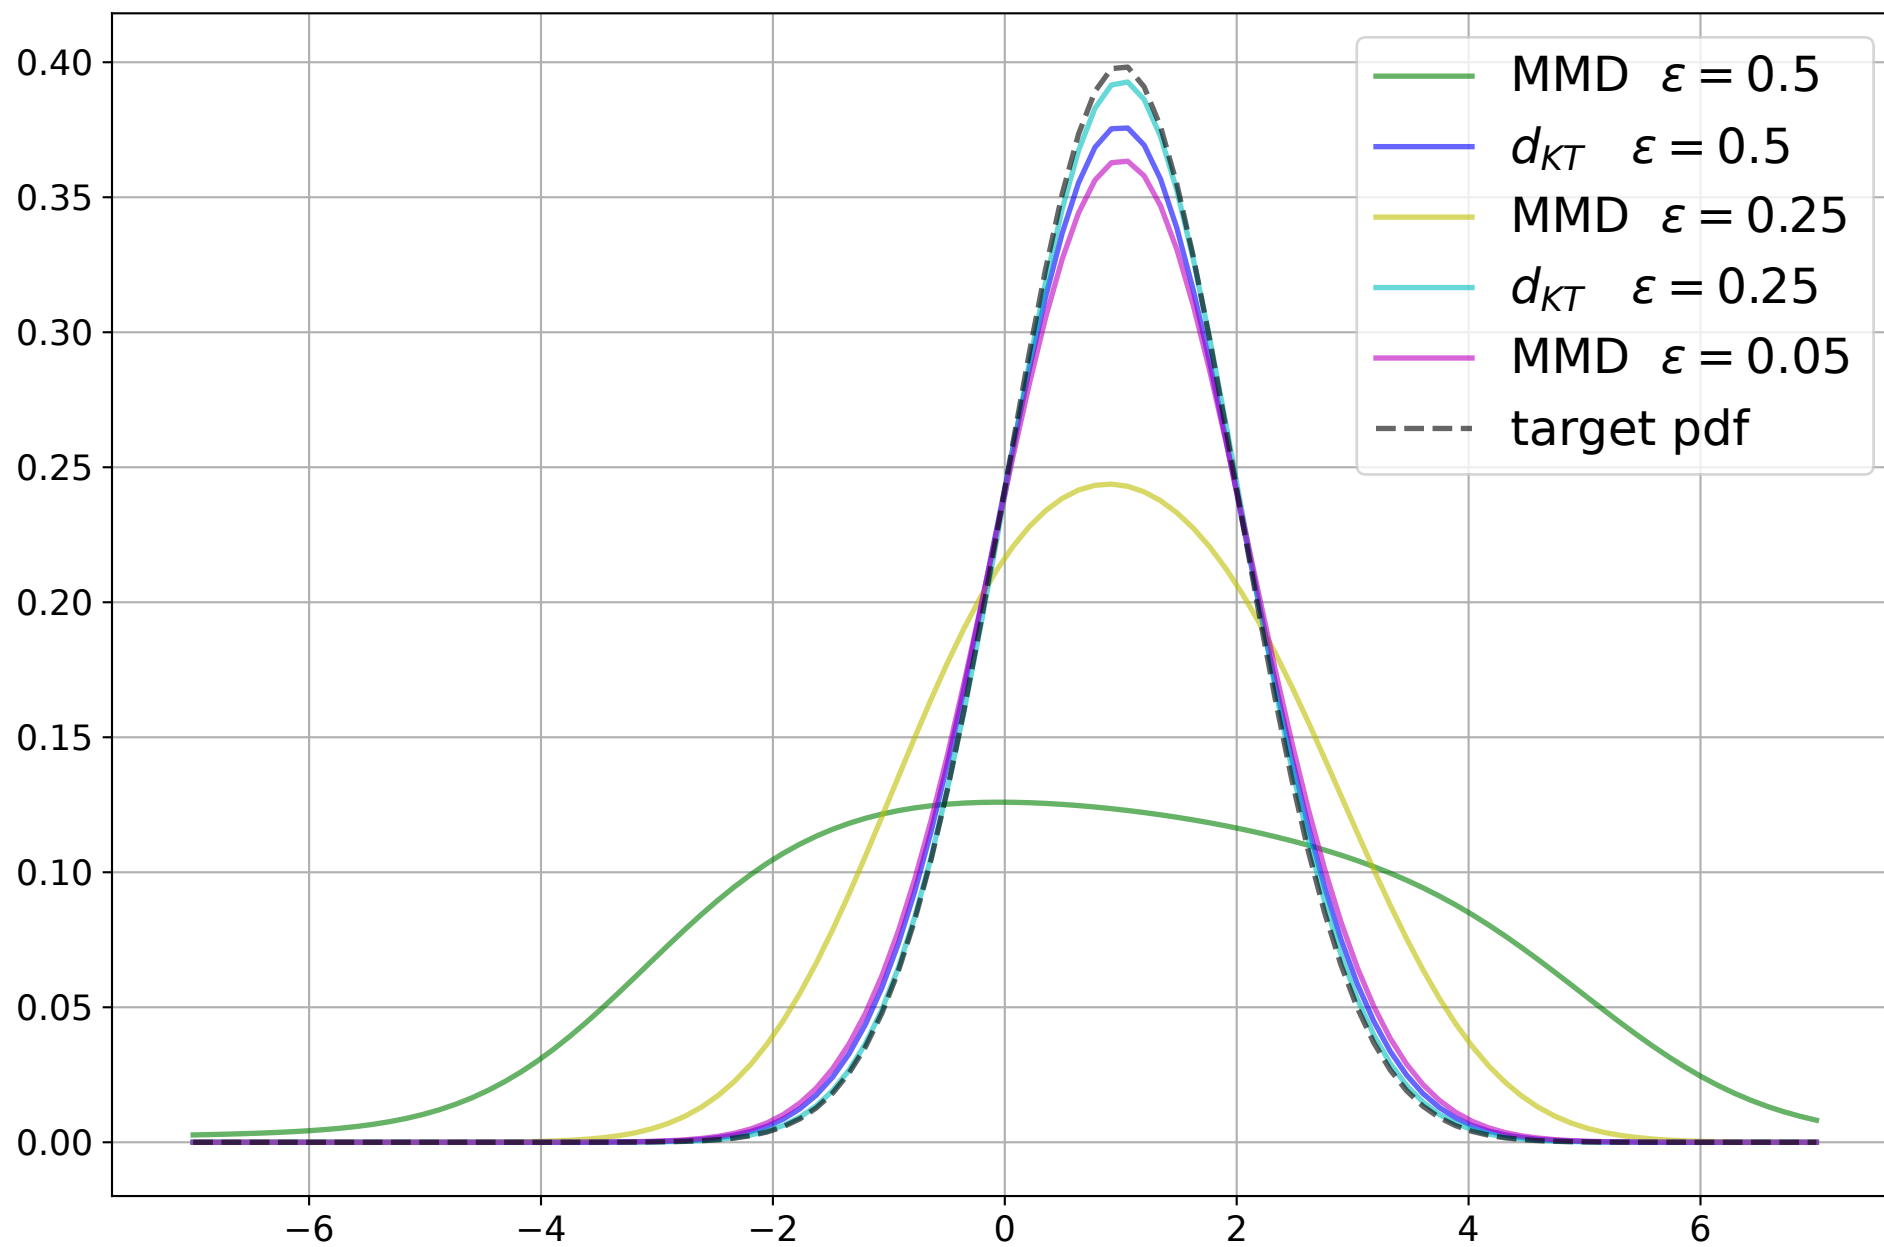

Supplement: supplementary_material [file ABC_posteriors.pdf › KDT_Neurips_2025_submission_supplementary/save/ABC_posteriors.pdf]

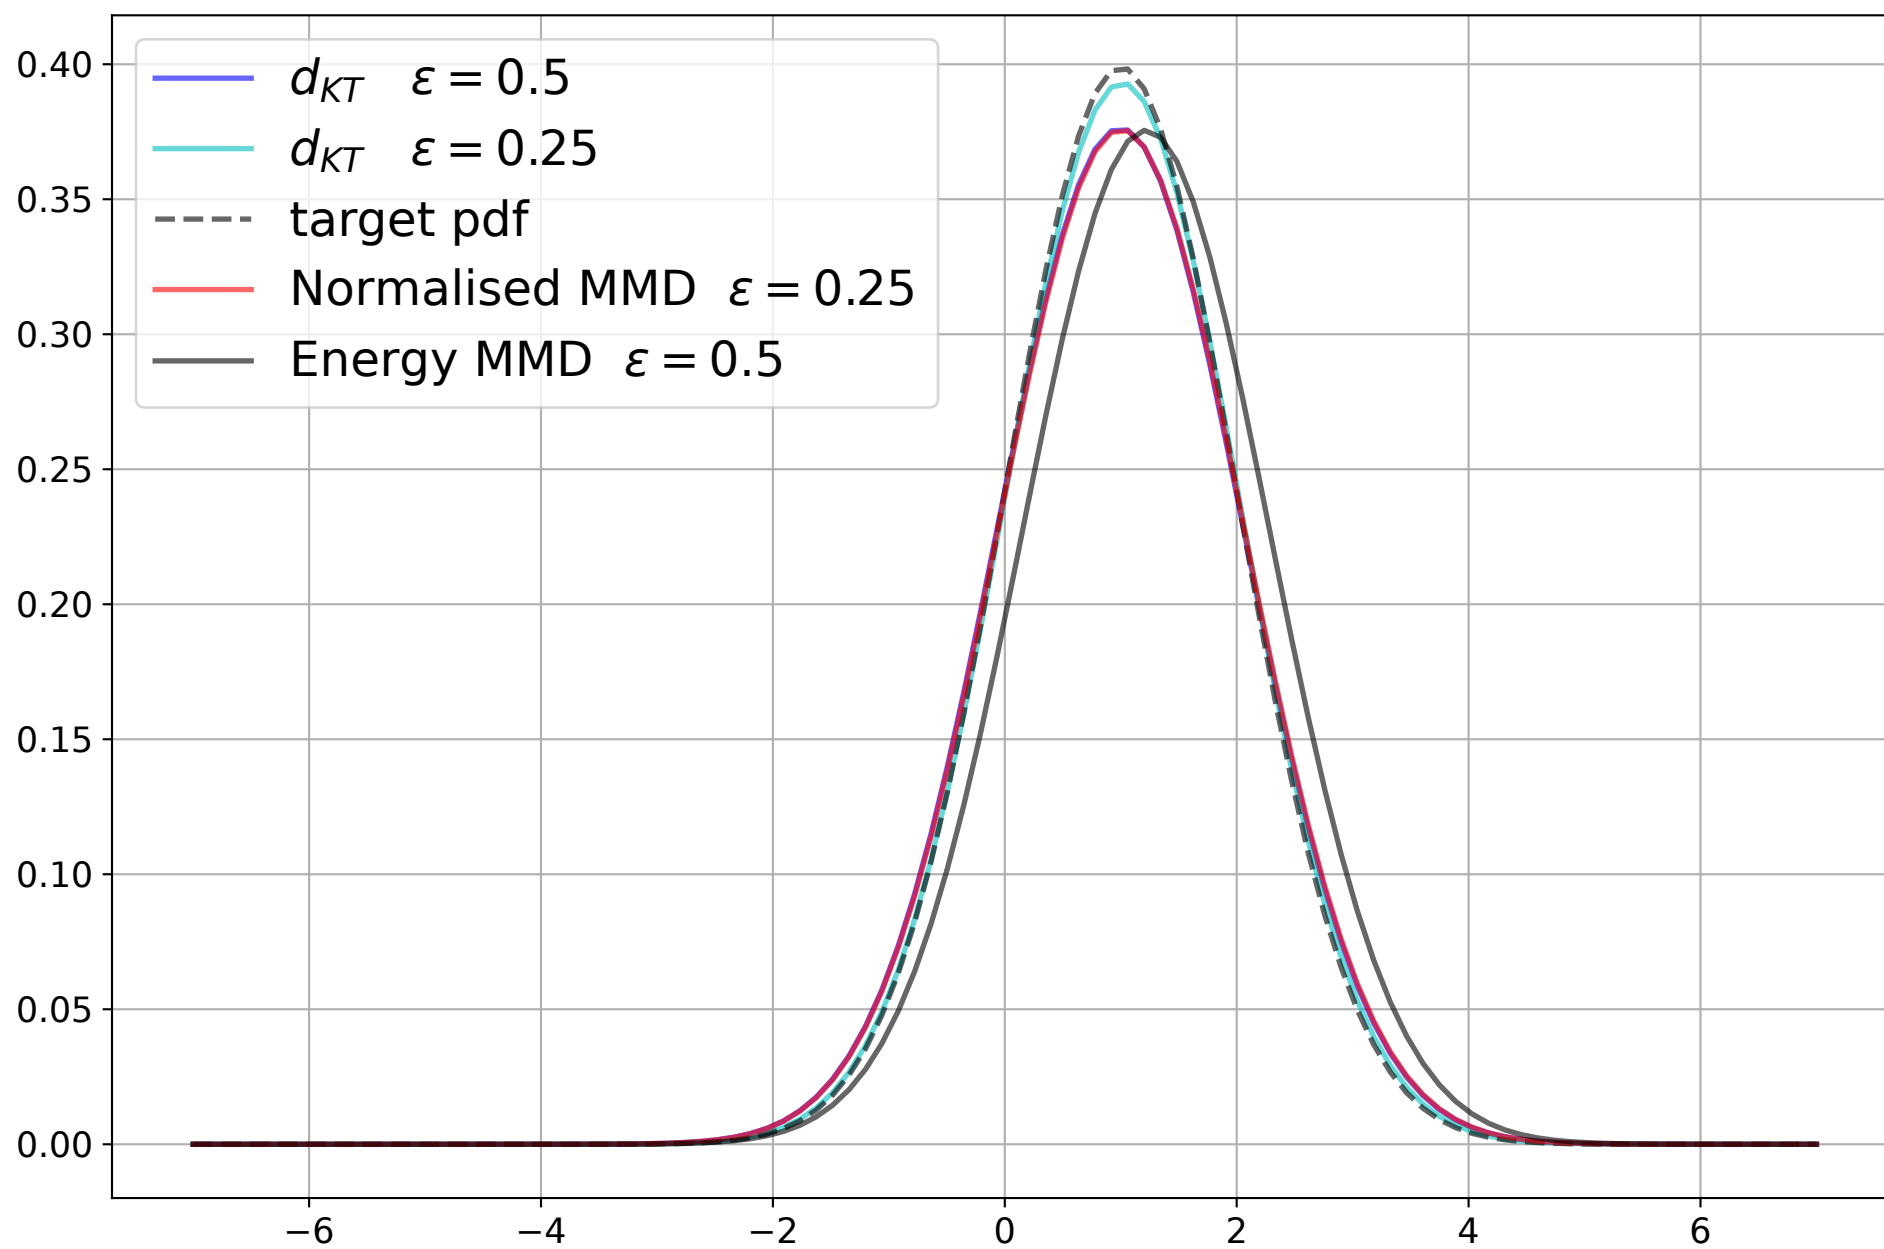

Supplement: supplementary_material [file ABC_posteriors_others.pdf › KDT_Neurips_2025_submission_supplementary/save/ABC_posteriors_others.pdf]

iteration 0

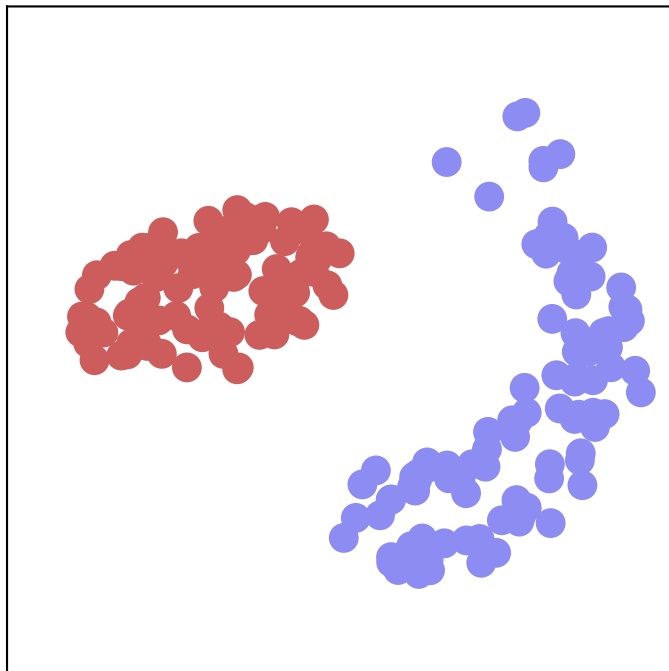

iteration 50

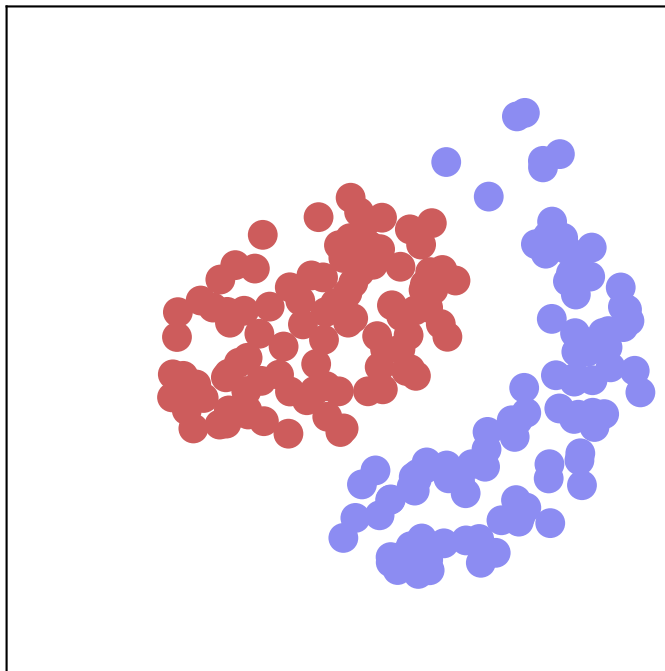

iteration 100

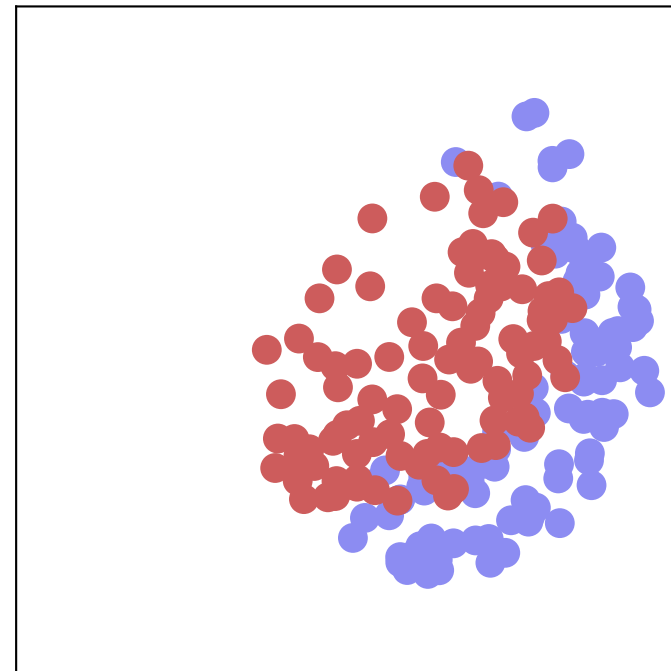

iteration 200

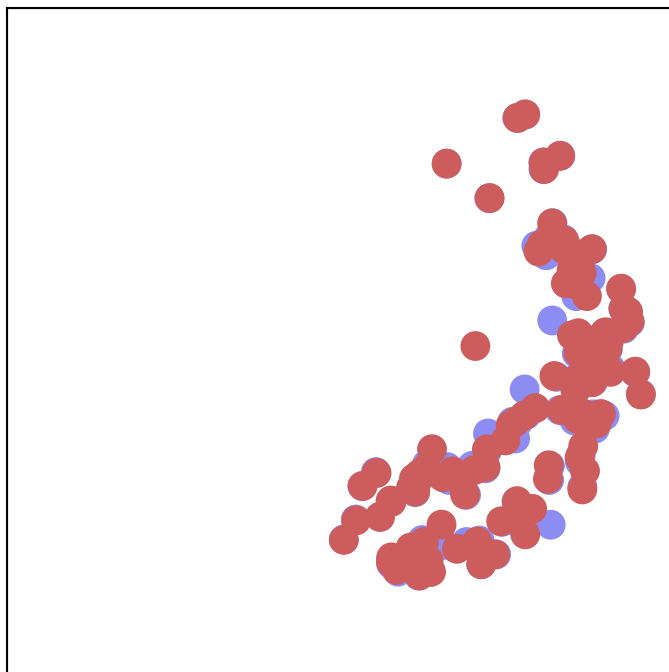

iteration 1000

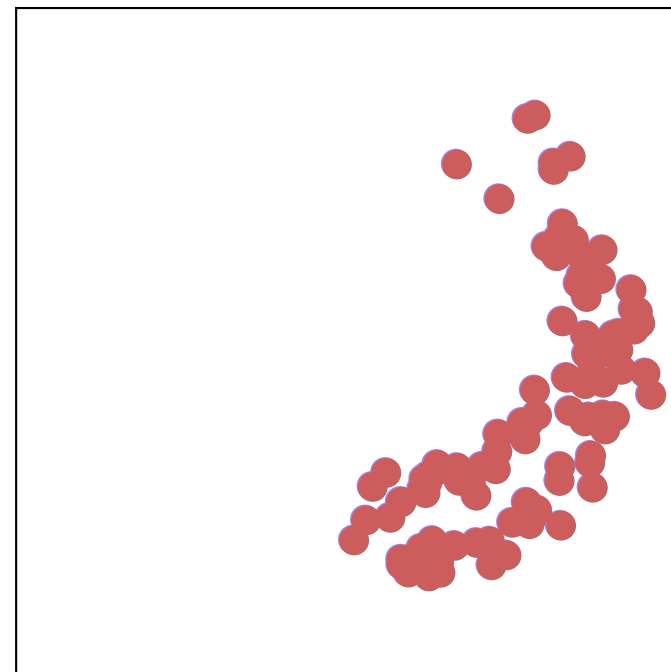

Supplement: supplementary_material [file gradient_flow_ sliced_wasserstein_distance.pdf › KDT_Neurips_2025_submission_supplementary/save/gradient_flow_ sliced_wasserstein_distance.pdf]

iteration 0

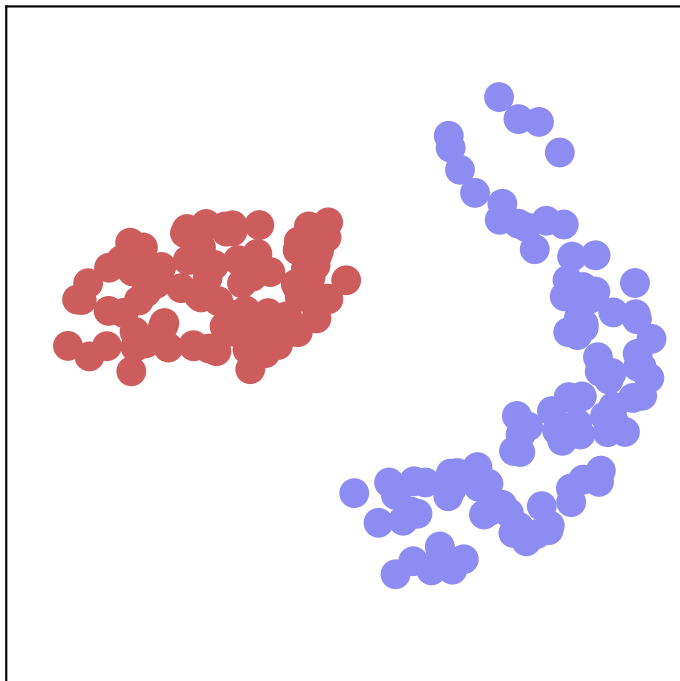

iteration 50

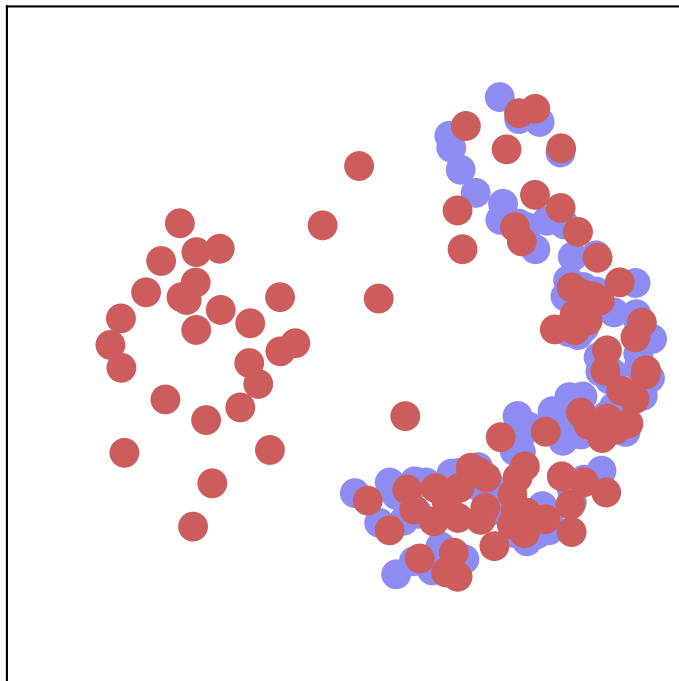

iteration 100

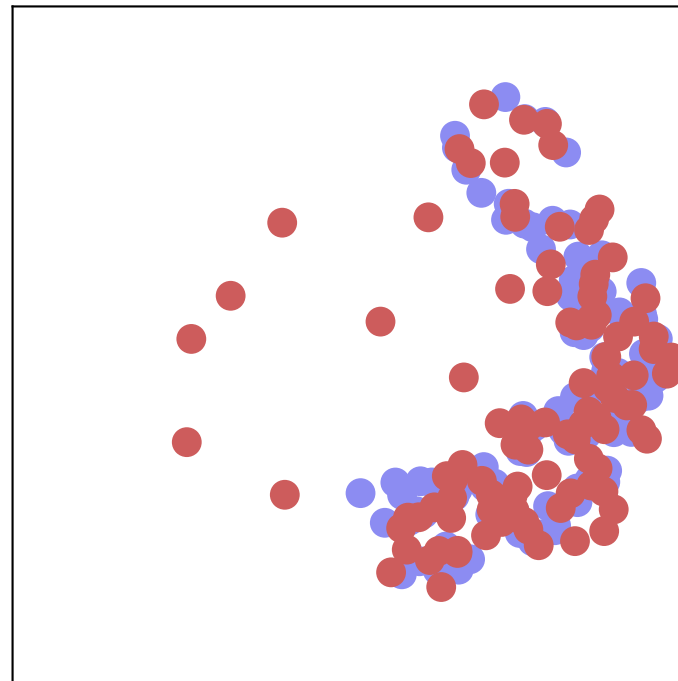

iteration 200

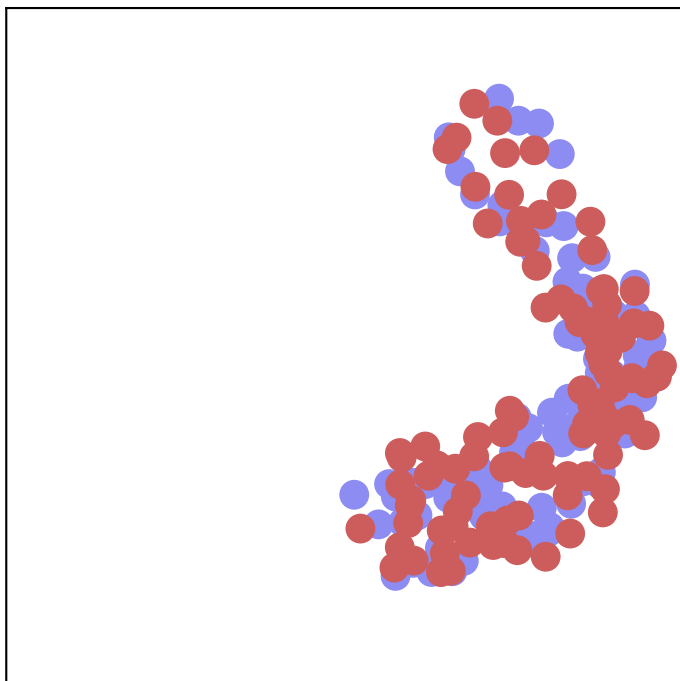

iteration 400

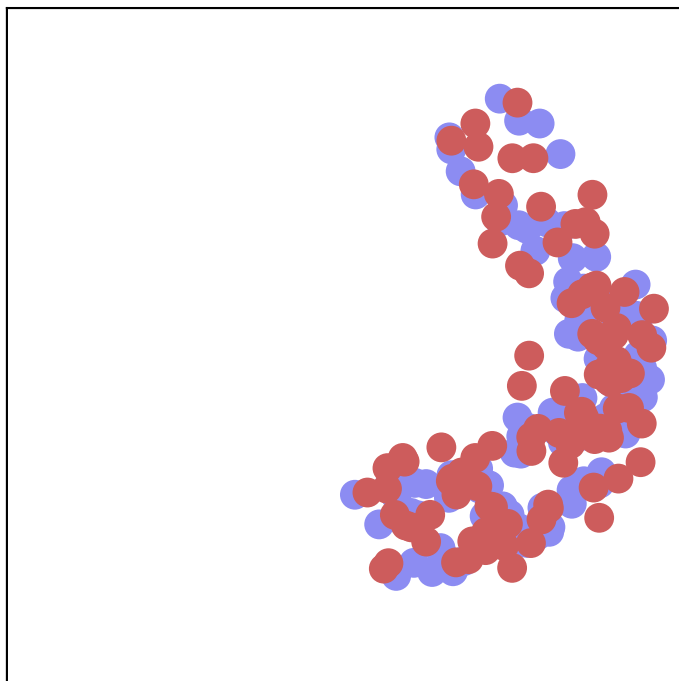

iteration 1000

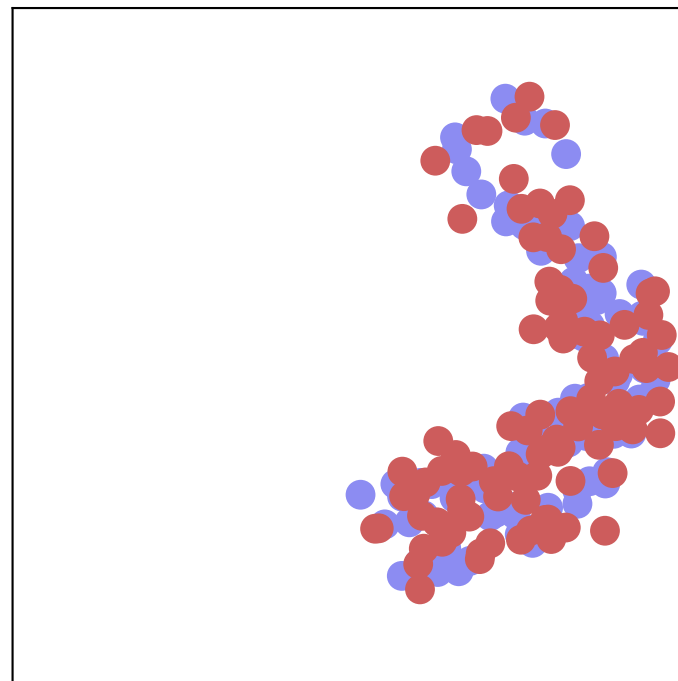

Supplement: supplementary_material [file gradient_flow_Laplace_dKT.pdf › KDT_Neurips_2025_submission_supplementary/save/gradient_flow_Laplace_dKT.pdf]

iteration 0



iteration 50

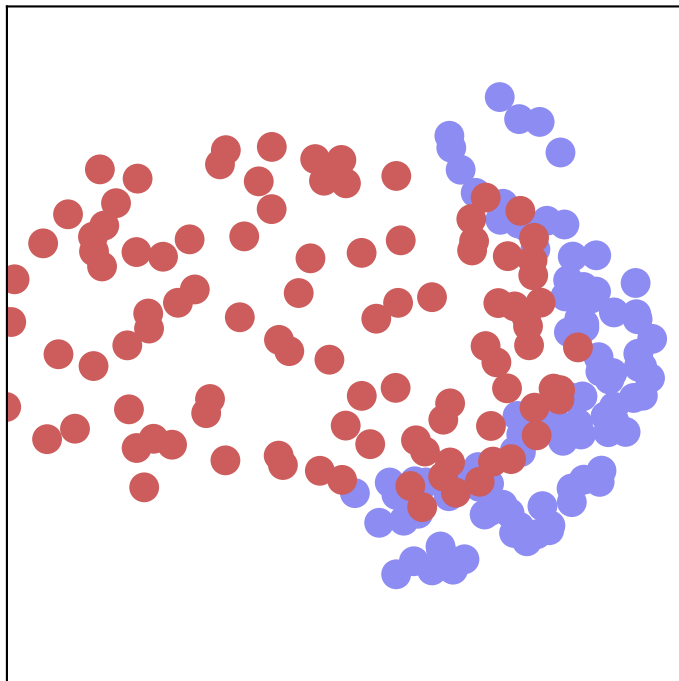

iteration 100

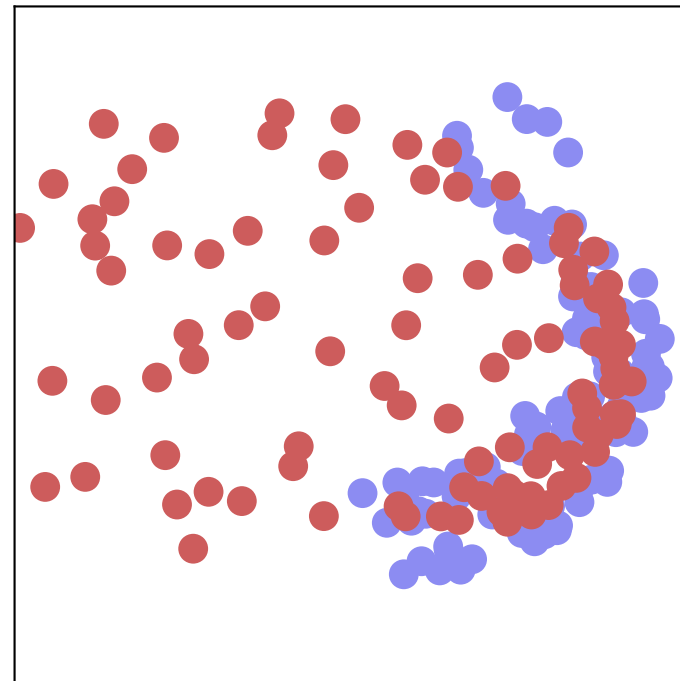

iteration 200

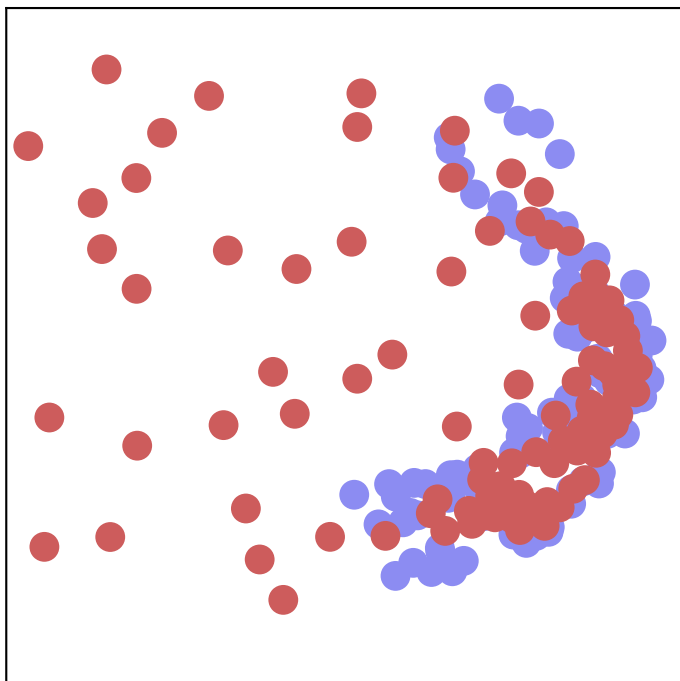

iteration 400

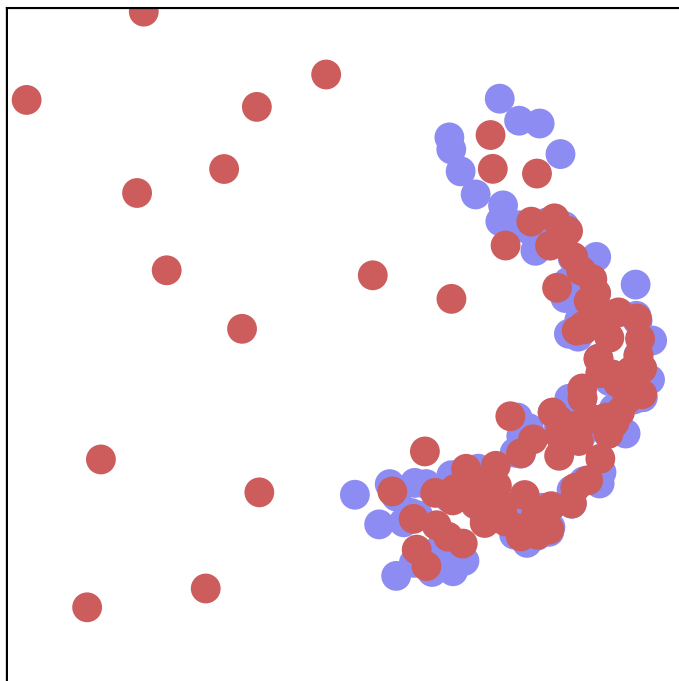

iteration 1000

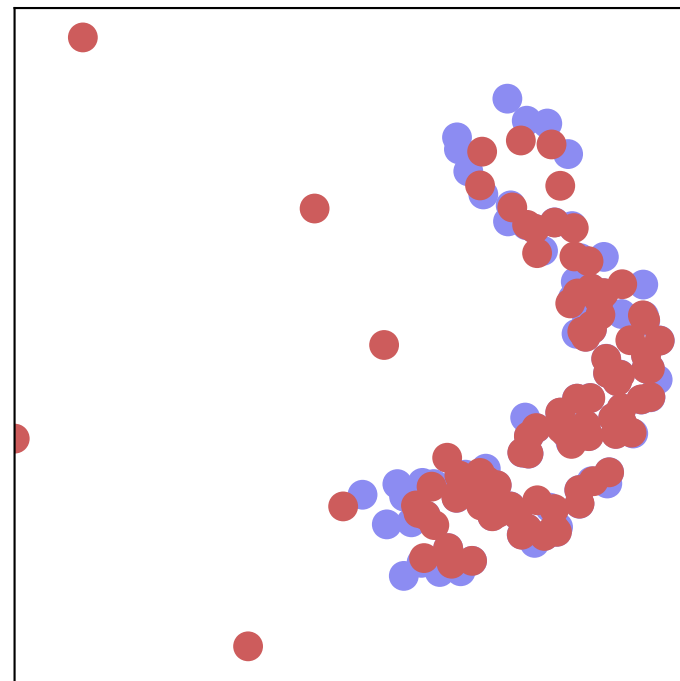

Supplement: supplementary_material [file gradient_flow_mmd.pdf › KDT_Neurips_2025_submission_supplementary/save/gradient_flow_mmd.pdf]

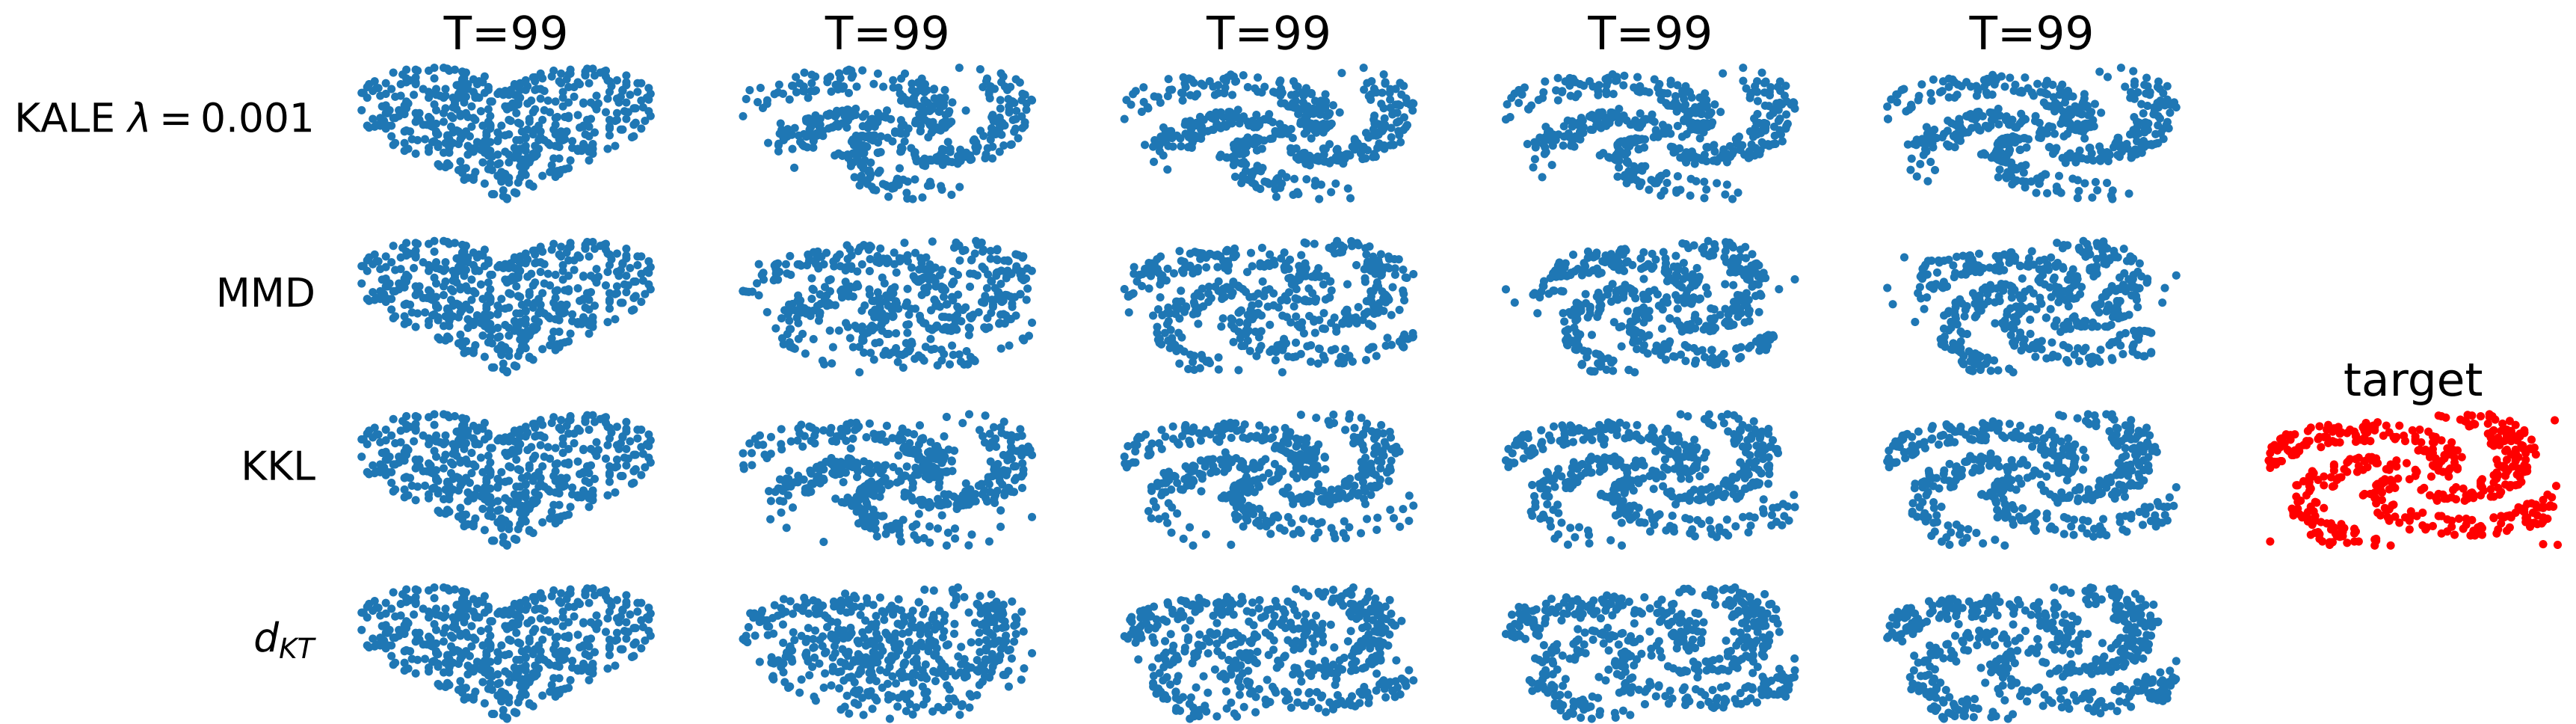

Supplement: supplementary_material [file shape_transfer.pdf › KDT_Neurips_2025_submission_supplementary/save/shape_transfer/shape_transfer.pdf]

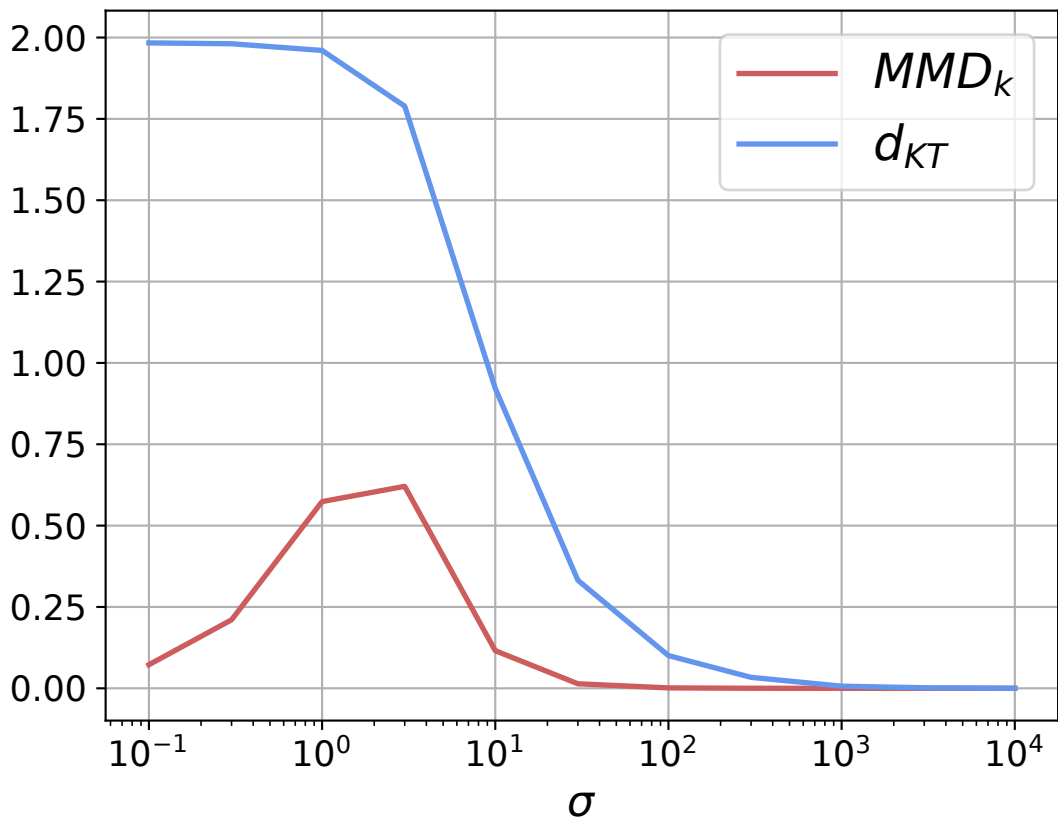

Supplement: supplementary_material [file var_kernel_sigma.pdf › KDT_Neurips_2025_submission_supplementary/save/var_kernel_sigma.pdf]

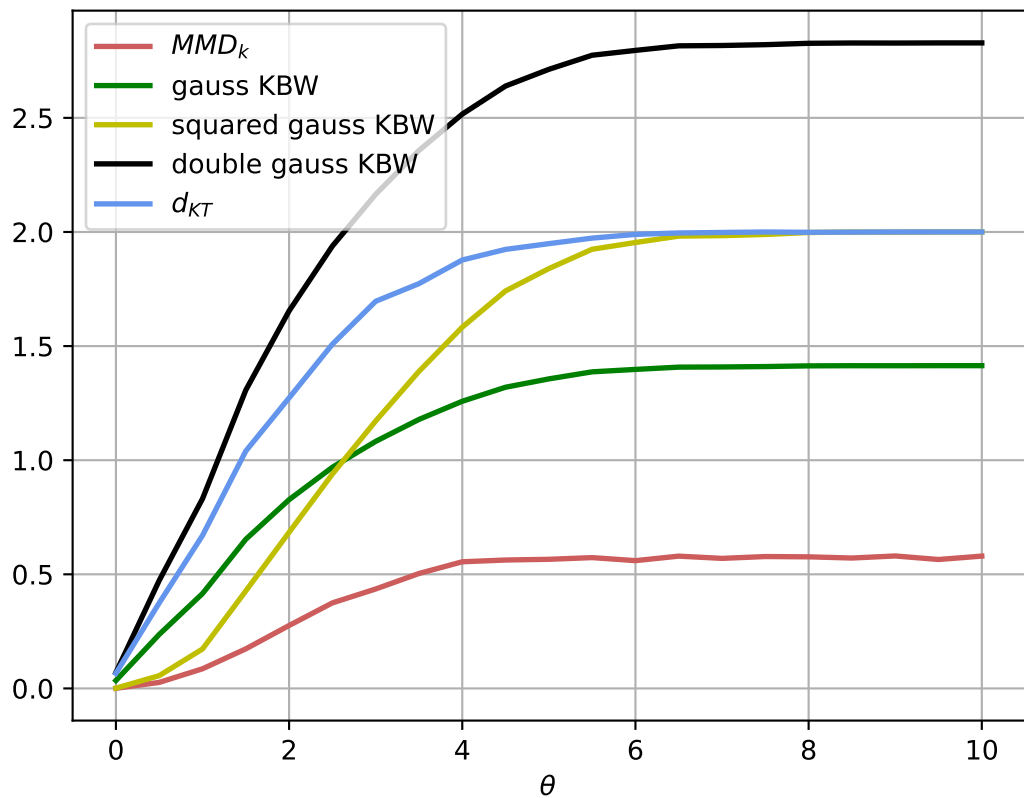

Supplement: supplementary_material [file var_mean_gauss_KBW.pdf › KDT_Neurips_2025_submission_supplementary/save/var_mean_gauss_KBW.pdf]

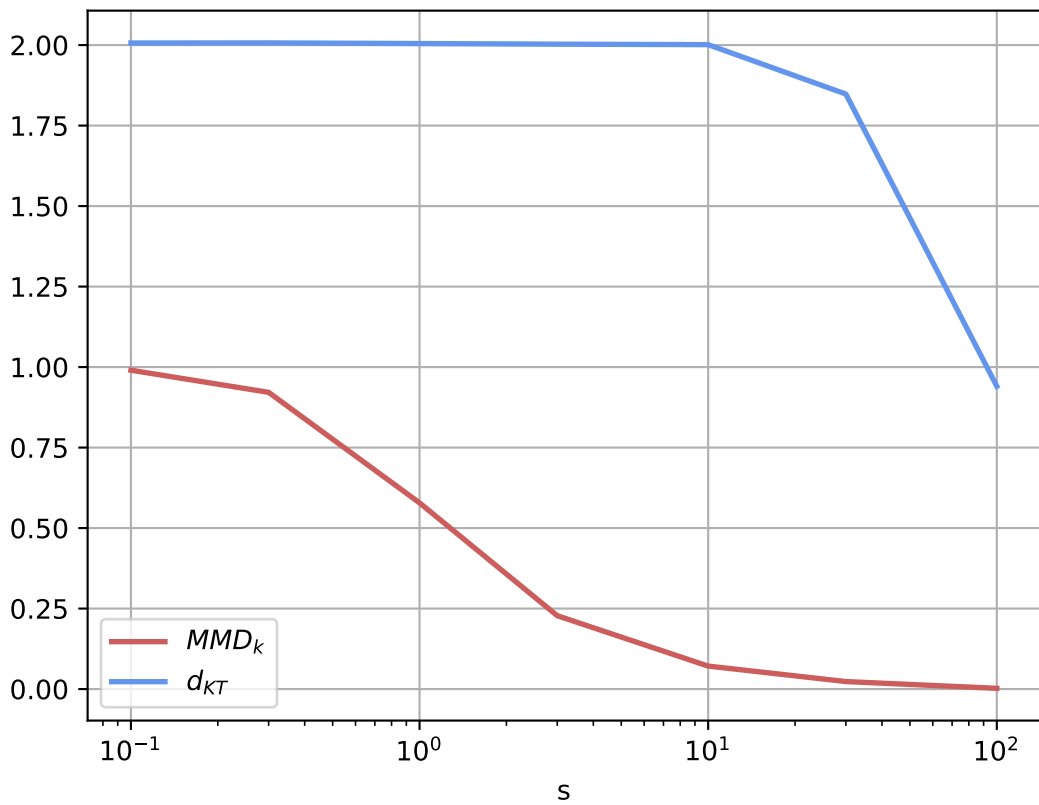

Supplement: supplementary_material [file var_std.pdf › KDT_Neurips_2025_submission_supplementary/save/var_std.pdf]
